# Supplementary material for: A Four-Dimensional Computational Model of Dynamic Contrast-Enhanced Magnetic Resonance Imaging Measurement of Subtle Blood-Brain Barrier Leakage
Source: Preprints.org preprint supplement (doi:10.20944/preprints202010.0200.v1), 2020-10-09
Supplement: Supplementary file 1 [file supplementary]

Table . PS error (estimate – ground truth) obtained using parameter map mean, signal mean, parameter map median, and signal median per region of interest as we progressively induced spatiotemporal imaging considerations. We report median error and interquartile range. AWGN: additive white Gaussian noise.

| **Spatiotemporal consideration** | **Method** | **PS error [x10-4 min-1]** | | | | | | | | | |
| --- | --- | --- | --- | --- | --- | --- | --- | --- | --- | --- | --- |
| **Normal-appearing white matter** | | **White matter hyperintensity** | | **Stroke lesion** | | **Cortical grey matter** | | **Deep grey matter** | |
| **Raw** | **Erosion** | **Raw** | **Erosion** | **Raw** | **Erosion** | **Raw** | **Erosion** | **Raw** | **Erosion** |
| k-space sampling | Parameter mean | 0.52  (0.48, 0.60) | 0.22  (0.21, 0.25) | 0.04  (0.01, 0.08) | 0.07  (-0.02, 0.14) | -0.78  (-0.92, -0.61) | -0.04  (-0.18, 0.32) | 1.45  (1.4, 1.49) | 0.69  (0.63, 0.75) | 0.11  (0.07, 0.21) | 0.08  (0.06, 0.14) |
| Signal mean | 0.48  (0.44, 0.54) | 0.22  (0.20, 0.25) | 0.01  (-0.02, 0.05) | 0.06  (-0.03, 0.13) | -0.80  (-0.94, -0.64) | -0.05  (-0.19, 0.32) | 1.29  (1.25, 1.33) | 0.63  (0.56, 0.68) | 0.06  (0.02, 0.15) | 0.06  (0.04, 0.12) |
| Parameter median | 0.30  (0.27, 0.33) | 0.15  (0.14, 0.16) | -0.02  (-0.11, 0.01) | 0.05  (-0.02, 0.12) | -0.69  (-0.84, -0.53) | -0.10  (-0.26, 0.14) | 0.05  (0.01, 0.10) | 0.05  (0.00, 0.09) | -0.17  (-0.20, -0.13) | 0.08  (0.05, 0.11) |
| Signal median | 0.14  (0.10, 0.17) | 0.19  (0.18, 0.21) | 0.10  (-0.06, 0.19) | 0.05  (-0.13, 0.26) | -0.46  (-0.66, -0.28) | -0.12  (-0.35, 0.15) | 1.57  (1.54, 1.66) | 0.77  (0.72, 0.85) | 0.16  (0.08, 0.24) | 0.19  (0.14, 0.37) |
| Gross motion k-space sampling | Parameter mean | -0.92  (-1.36, -0.51) | -0.34  (-0.45, -0.24) | 0.75  (0.45, 1.18) | 0.35  (0.09, 0.6) | -0.65  (-0.86, -0.34) | 0.25  (-0.05, 0.62) | 2.13  (1.86, 2.41) | 0.96  (0.85, 1.06) | 0.53  (0.40, 0.76) | 0.34  (0.23, 0.58) |
| Signal mean | -1.00  (-1.48, -0.58) | -0.38  (-0.50, -0.28) | 0.65  (0.39, 1.03) | 0.30  (0.07, 0.56) | -0.68  (-0.88, -0.37) | 0.23  (-0.06, 0.61) | 1.77  (1.58, 2) | 0.70  (0.64, 0.81) | 0.44  (0.32, 0.64) | 0.27  (0.17, 0.52) |
| Parameter median | -0.69  (-1.03, -0.43) | -0.25  (-0.32, -0.17) | 0.72  (0.38, 1.09) | 0.46  (0.21, 0.8) | -0.55  (-0.81, -0.27) | 0.15  (-0.15, 0.45) | 1.04  (0.74, 1.28) | 0.41  (0.28, 0.53) | 0.41  (0.24, 0.72) | 0.38  (0.26, 0.58) |
| Signal median | -1.24  (-1.72, -0.85) | -0.36  (-0.50, -0.24) | 0.92  (0.51, 1.37) | 0.49  (0.05, 0.78) | -0.30  (-0.64, 0.01) | 0.07  (-0.21, 0.45) | 1.95  (1.8, 2.11) | 0.80  (0.72, 0.88) | 0.78  (0.49, 1.02) | 0.49  (0.32, 0.78) |
| Gross motion k-space sampling Motion artefacts | Parameter mean | -0.98  (-1.51, -0.53) | -0.39  (-0.51, -0.28) | 0.78  (0.50, 1.25) | 0.35  (0.12, 0.64) | -0.65  (-0.87, -0.31) | 0.26  (-0.05, 0.66) | 2.20  (1.9, 2.47) | 1.00  (0.87, 1.11) | 0.56  (0.43, 0.77) | 0.34  (0.23, 0.59) |
| Signal mean | -1.08  (-1.59, -0.63) | -0.42  (-0.54, -0.32) | 0.69  (0.42, 1.1) | 0.31  (0.1, 0.56) | -0.68  (-0.89, -0.36) | 0.25  (-0.06, 0.63) | 1.82  (1.61, 2.06) | 0.74  (0.65, 0.84) | 0.47  (0.34, 0.66) | 0.28  (0.17, 0.52) |
| Parameter median | -0.75  (-1.11, -0.46) | -0.27  (-0.36, -0.19) | 0.76  (0.45, 1.16) | 0.48  (0.24, 0.83) | -0.58  (-0.82, -0.26) | 0.16  (-0.14, 0.48) | 1.10  (0.79, 1.37) | 0.45  (0.30, 0.57) | 0.48  (0.26, 0.74) | 0.39  (0.26, 0.6) |
| Signal median | -1.36  (-1.84, -0.9) | -0.38  (-0.51, -0.25) | 0.96  (0.58, 1.44) | 0.46  (0.07, 0.77) | -0.31  (-0.64, 0.01) | 0.08  (-0.25, 0.49) | 1.98  (1.82, 2.14) | 0.82  (0.73, 0.90) | 0.78  (0.55, 1.07) | 0.50  (0.32, 0.80) |
| Gross motion  k-space sampling Motion artefacts AWGN | Parameter mean | -0.96  (-1.48, -0.54) | -0.35  (-0.48, -0.24) | 0.82  (0.55, 1.28) | 0.39  (0.09, 0.67) | -0.65  (-0.93, -0.25) | 0.29  (-0.16, 0.65) | 2.22  (1.94, 2.49) | 1.02  (0.90, 1.13) | 0.58  (0.45, 0.81) | 0.37  (0.26, 0.63) |
| Signal mean | -1.10  (-1.61, -0.65) | -0.43  (-0.55, -0.32) | 0.71  (0.47, 1.08) | 0.33  (0.03, 0.59) | -0.69  (-0.98, -0.31) | 0.25  (-0.19, 0.6) | 1.82  (1.61, 2.05) | 0.74  (0.65, 0.84) | 0.47  (0.34, 0.64) | 0.28  (0.18, 0.54) |
| Parameter median | -0.88  (-1.25, -0.56) | -0.35  (-0.45, -0.26) | 0.70  (0.47, 1.16) | 0.45  (0.14, 0.76) | -0.63  (-0.96, -0.25) | 0.20  (-0.19, 0.64) | 1.16  (0.87, 1.4) | 0.49  (0.35, 0.60) | 0.43  (0.25, 0.71) | 0.37  (0.25, 0.64) |
| Signal median | -1.21  (-1.65, -0.78) | -0.42  (-0.54, -0.30) | 0.89  (0.60, 1.44) | 0.45  (0.02, 0.75) | -0.37  (-0.72, 0.02) | 0.21  (-0.23, 0.62) | 1.98  (1.83, 2.14) | 0.83  (0.74, 0.91) | 0.73  (0.53, 1.04) | 0.47  (0.31, 0.78) |

Table . Relative PS error obtained using parameter map mean, signal mean, parameter map median, and signal median per region of interest as we progressively induced spatiotemporal imaging considerations. We report median error and interquartile range. AWGN: additive white Gaussian noise.

| **Spatiotemporal consideration** | **Method** | **Relative PS error (%)** | | | | | | | | | |
| --- | --- | --- | --- | --- | --- | --- | --- | --- | --- | --- | --- |
| **Normal-appearing white matter** | | **White matter hyperintensity** | | **Stroke lesion** | | **Cortical grey matter** | | **Deep grey matter** | |
| **Raw** | **Erosion** | **Raw** | **Erosion** | **Raw** | **Erosion** | **Raw** | **Erosion** | **Raw** | **Erosion** |
| k-space sampling | Parameter mean | 18.93  (17.43, 21.89) | 8.15  (7.66, 9.24) | 1.01  (0.27, 2.01) | 1.81  (-0.51, 3.50) | -10.75  (-12.69, -8.46) | -0.50  (-2.53, 4.44) | 37.57  (36.38, 38.83) | 17.93  (16.27, 19.39) | 2.72  (1.72, 5.38) | 1.98  (1.46, 3.7) |
| Signal mean | 17.45  (15.91, 19.78) | 7.97  (7.45, 9.02) | 0.34  (-0.43, 1.32) | 1.65  (-0.83, 3.28) | -11.01  (-12.91, -8.77) | -0.63  (-2.56, 4.40) | 33.54  (32.38, 34.66) | 16.24  (14.43, 17.62) | 1.29  (0.41, 3.81) | 1.56  (1.06, 3.11) |
| Parameter median | 11.01  (9.75, 12.05) | 5.52  (5.05, 5.91) | -0.59  (-2.70, 0.25) | 1.24  (-0.65, 3.26) | -9.50  (-11.55, -7.27) | -1.31  (-3.58, 1.93) | 1.27  (0.17, 2.61) | 1.20  (-0.14, 2.31) | -4.47  (-5.12, -3.26) | 2.02  (1.22, 2.78) |
| Signal median | 5.24  (3.49, 6.32) | 6.98  (6.36, 7.63) | 2.57  (-1.50, 4.92) | 1.23  (-3.26, 6.61) | -6.29  (-9.17, -3.89) | -1.62  (-4.89, 2.05) | 40.71  (39.87, 43.04) | 20.04  (18.67, 22.07) | 4.06  (2.17, 6.32) | 4.94  (3.65, 9.58) |
| Gross motion k-space sampling | Parameter mean | -33.61  (-49.94, -18.42) | -12.47  (-16.55, -8.76) | 19.03  (11.38, 30.11) | 8.77  (2.18, 15.37) | -8.97  (-11.85, -4.74) | 3.42  (-0.67, 8.58) | 55.19  (47.99, 62.61) | 24.84  (22.05, 27.43) | 13.85  (10.43, 19.78) | 8.81  (5.88, 15.06) |
| Signal mean | -36.54  (-53.69, -21.19) | -13.81  (-18.42, -10.29) | 16.26  (9.66, 26.35) | 7.56  (1.54, 14.27) | -9.29  (-12.14, -5.10) | 3.14  (-0.78, 8.46) | 46.00  (40.79, 51.98) | 18.19  (16.73, 21.05) | 11.43  (8.29, 16.73) | 7.19  (4.42, 13.52) |
| Parameter median | -24.99  (-37.6, -15.75) | -9.06  (-11.89, -6.30) | 18.12  (9.81, 27.7) | 11.70  (5.10, 20.55) | -7.66  (-11.15, -3.72) | 2.02  (-2.03, 6.22) | 27.01  (19.18, 33.23) | 10.65  (7.34, 13.67) | 10.75  (6.18, 18.59) | 9.77  (6.66, 15.12) |
| Signal median | -44.97  (-63.78, -30.81) | -13.19  (-18.39, -8.45) | 23.46  (12.83, 34.91) | 12.43  (1.01, 19.92) | -4.12  (-8.83, 0.18) | 0.97  (-2.89, 6.15) | 50.59  (46.54, 54.65) | 20.85  (18.68, 22.97) | 20.19  (12.81, 26.55) | 12.91  (8.28, 20.15) |
| Gross motion k-space sampling Motion artefacts | Parameter mean | -35.70  (-55.09, -19.36) | -14.27  (-18.59, -10.14) | 19.73  (12.79, 32.08) | 8.98  (3.04, 16.24) | -8.78  (-12.02, -4.26) | 3.62  (-0.67, 9.08) | 57.19  (49.17, 64.09) | 25.82  (22.29, 28.91) | 14.45  (11.10, 20.14) | 8.94  (6.01, 15.27) |
| Signal mean | -39.21  (-58, -22.53) | -15.30  (-19.67, -11.5) | 17.26  (10.58, 28.26) | 7.88  (2.07, 14.31) | -9.12  (-12.37, -4.96) | 3.51  (-0.78, 8.70) | 47.16  (41.57, 53.42) | 19.12  (16.97, 21.8) | 12.12  (8.89, 17.29) | 7.24  (4.41, 13.47) |
| Parameter median | -27.21  (-40.71, -16.64) | -9.86  (-13.20, -6.97) | 19.39  (11.43, 29.64) | 12.09  (6.05, 21.33) | -8.02  (-11.33, -3.63) | 2.14  (-2.00, 6.62) | 28.49  (20.22, 35.58) | 11.65  (7.89, 14.92) | 12.52  (6.72, 19.2) | 10.23  (6.65, 15.66) |
| Signal median | -49.47  (-67.13, -32.89) | -14.00  (-18.71, -9.02) | 24.51  (14.85, 36.72) | 11.69  (1.68, 19.71) | -4.21  (-8.90, 0.08) | 1.10  (-3.36, 6.81) | 51.54  (47.32, 55.67) | 21.33  (18.97, 23.4) | 20.26  (14.50, 27.92) | 13.03  (8.36, 20.87) |
| Gross motion  k-space sampling Motion artefacts AWGN | Parameter mean | -35.01  (-54.05, -18.92) | -12.86  (-17.59, -8.65) | 20.72  (13.82, 32.68) | 10.06  (1.89, 17.22) | -8.96  (-12.88, -3.32) | 3.94  (-2.2, 9.64) | 57.72  (50.25, 64.66) | 26.47  (23.34, 29.45) | 14.95  (11.58, 21.04) | 9.57  (6.73, 16.32) |
| Signal mean | -39.91  (-58.7, -23.58) | -15.65  (-20.15, -11.74) | 17.88  (11.72, 27.74) | 8.31  (0.41, 15.02) | -9.53  (-13.49, -4.17) | 3.50  (-2.68, 8.49) | 47.20  (41.70, 53.27) | 19.09  (16.85, 21.71) | 12.11  (8.72, 16.99) | 7.39  (4.70, 13.87) |
| Parameter median | -32.05  (-45.44, -20.32) | -12.79  (-16.33, -9.32) | 17.88  (11.82, 29.76) | 11.31  (3.63, 19.55) | -8.70  (-13.26, -3.34) | 2.78  (-2.57, 8.80) | 30.18  (22.5, 36.41) | 12.69  (9.14, 15.54) | 11.21  (6.56, 18.47) | 9.68  (6.50, 16.56) |
| Signal median | -43.87  (-61.39, -28.46) | -15.27  (-19.63, -10.93) | 22.48  (15.44, 36.83) | 11.44  (0.38, 19.22) | -5.11  (-9.99, 0.24) | 2.92  (-3.15, 8.54) | 51.46  (47.46, 55.58) | 21.47  (19.32, 23.58) | 18.86  (13.78, 26.93) | 12.34  (8.01, 20.17) |
